# Supplementary material for: Variables Associated With Perceived Unmet Need for Mental Health Care in a Canadian Epidemiologic Catchment Area
Source: Atypon-hosted journal article supplement (doi:10.1176/appi.ps.201400363), 2015-09-01
Supplement: appi.ps.201400363.ds001.pdf [file appi.ps.201400363.ds001.pdf]

## Appendix 1. Figure 1. Flowchart of the sample from baseline (T1) to third survey (T3)

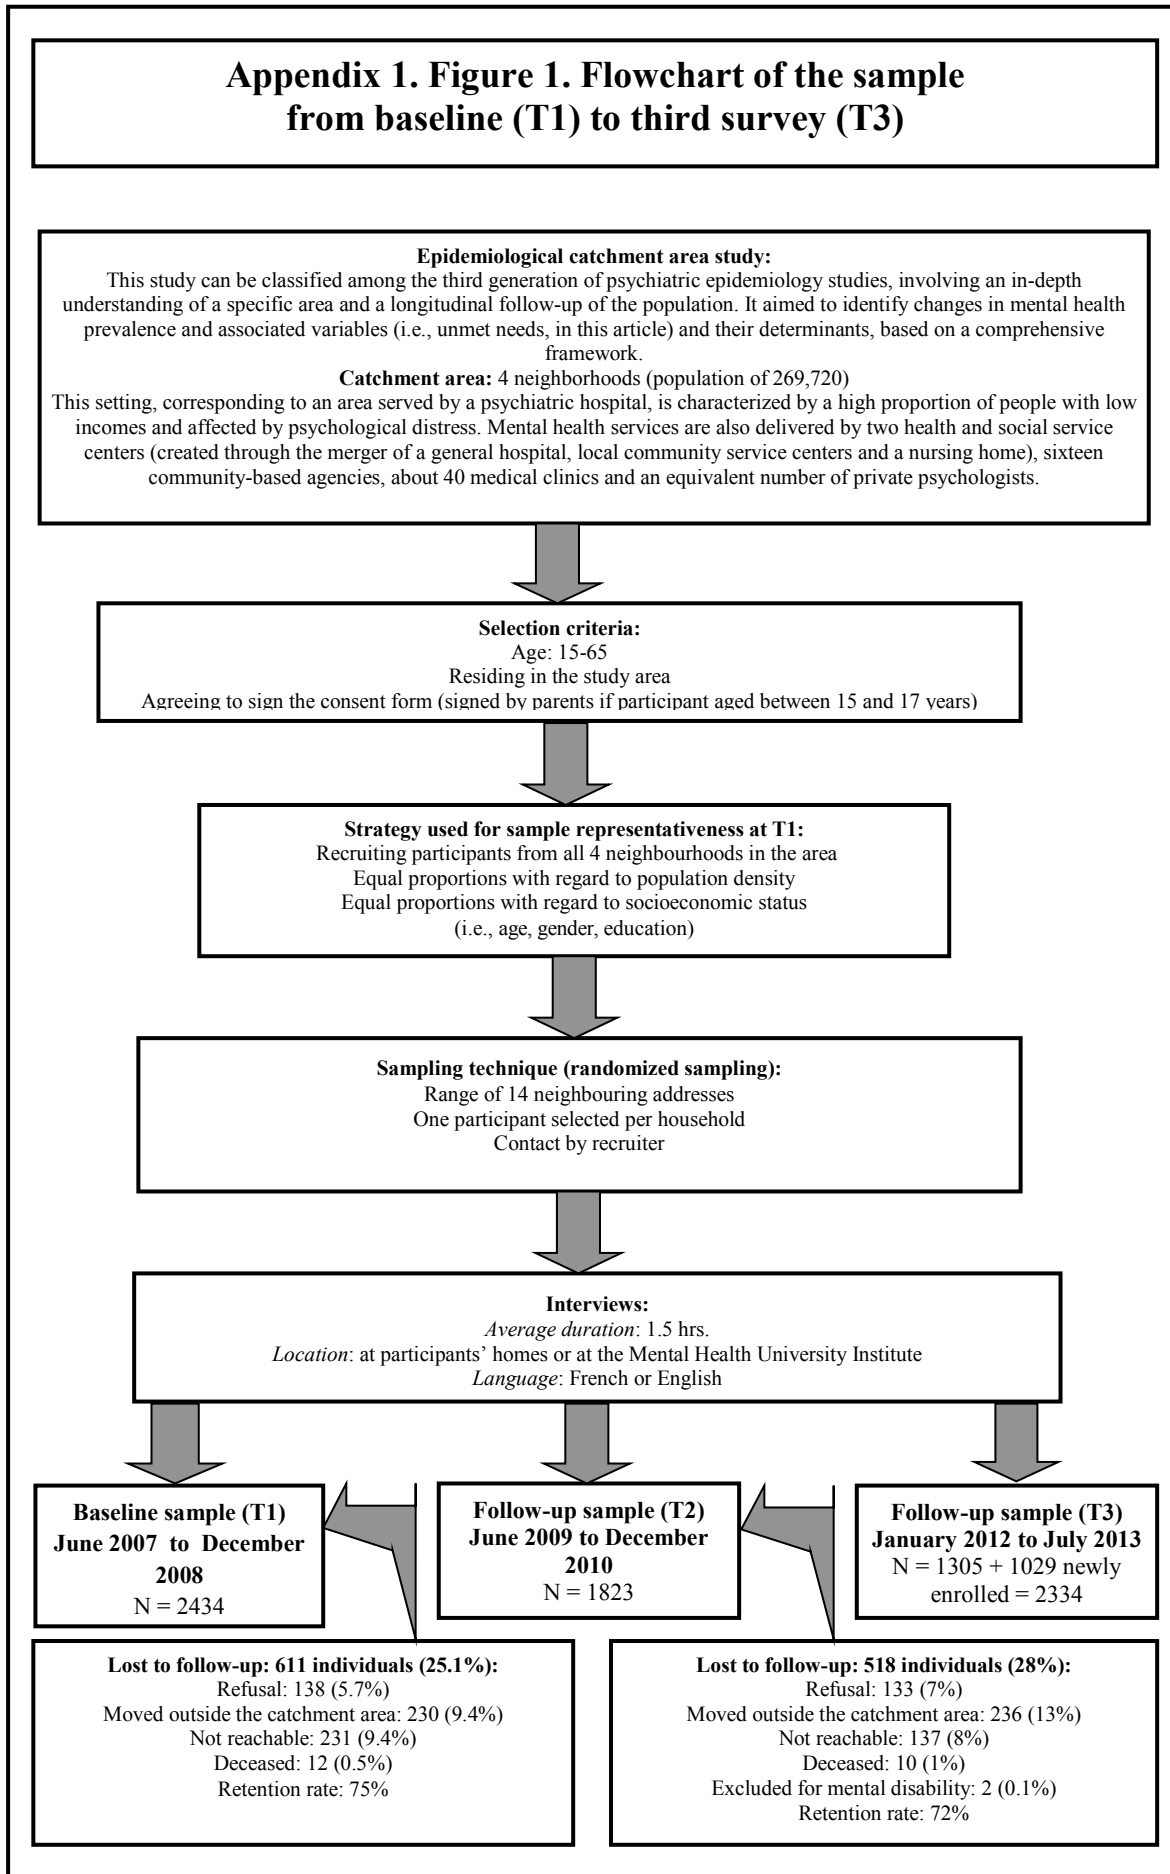

**Appendix 2: Table 1. Measurement instruments**

|    | <b>Name</b>                                                                                    | <b>Description</b>                                                                                                                                                                                                                                                                                                                                                 |
|----|------------------------------------------------------------------------------------------------|--------------------------------------------------------------------------------------------------------------------------------------------------------------------------------------------------------------------------------------------------------------------------------------------------------------------------------------------------------------------|
| 1  | Canadian Community Health Survey (CCHS) 1.2 (1)                                                | Survey questionnaire for socio-demographic characteristics; Yes/No and multiple-choice questions; Likert and non-Likert scale questions                                                                                                                                                                                                                            |
| 2  | Satisfaction with Life Domains Scale (SLDS) (2)                                                | 20 items organized in 5 domains: daily living and social relationships, living environment, autonomy, intimate relationships, and leisure (Min = 20; Max = 140). Higher = positive. Cronbach's alpha = .92                                                                                                                                                         |
| 3  | Sense of Community Index Scale (SCS) (3)                                                       | 9 items; 2- or 3-point Likert scale questions (Min = 9; Max = 21). Higher = negative. Cronbach's alpha = .74                                                                                                                                                                                                                                                       |
| 4  | Community Involvement Scale (CIS) (4)                                                          | 6 items; Yes/No and 4-point Likert scale questions; Higher = negative. Cronbach's alpha = .73-.89                                                                                                                                                                                                                                                                  |
| 5  | Resident Disempowerment Scale (RDS) (5)                                                        | 3 items; 10 Likert scale (Min = 3; Max = 30). Higher = positive                                                                                                                                                                                                                                                                                                    |
| 6  | Sense of Collective Efficacy (SCE) (6)                                                         | 10 items (social cohesion and informal social control); 5 Likert scale question (Min = 10; Max = 50). Higher = negative. Cronbach's alpha = .80-.91                                                                                                                                                                                                                |
| 7  | Neighborhood Disorder Scale (NDS) (5)                                                          | 11 items; 10 Likert scale questions (Min = 1; Max = 110). Higher = negative. Cronbach's alpha = .84                                                                                                                                                                                                                                                                |
| 8  | Neighborhood Physical Conditions Scale (NPC) (3)                                               | 7 items; 10 Likert scale questions (Min = 10; Max = 70). Higher = positive. Cronbach's alpha = .87                                                                                                                                                                                                                                                                 |
| 9  | Neighborhood Behavior Scale (NBS) (7)                                                          | 5 items; 9 Likert scale questions (Min = 9; Max = 45). Higher = positive. Cronbach's alpha = .78                                                                                                                                                                                                                                                                   |
| 10 | Neighborhood safety subscale of the International Physical Activity Questionnaire (IPAQ-E) (8) | 2 items (safety from crime during the day and the night) (Min = 2; Max = 8). Higher = negative. Cronbach's alpha = .71                                                                                                                                                                                                                                             |
| 11 | Social Provisions Scale (SPS) (9)                                                              | 24 items; 4- point Likert scale questions (Min = 24; Max = 96). Cronbach's alpha = .92                                                                                                                                                                                                                                                                             |
| 12 | Composite International Diagnostic (CIDI and CIDI-SF) (1)                                      | Screening for mental disorders; used in the WMH 2000; Limited to most frequent mental disorders (depression, mania, general anxiety disorder, posttraumatic stress disorder, agoraphobias, traumatic stress disorder, anxiety disorders: social phobia, panic disorder). Screening for substance disorders (alcohol and drugs, based on the CIDI-Short Form - SF). |
| 13 | Modified Observed Aggression Scale (MOAS) for aggressive behaviors (10)                        | Assess 4 categories of aggressive behavior: verbal aggression, aggression against property, self-inflicted aggression, physical aggression. Yes/No questions.                                                                                                                                                                                                      |
| 14 | K-10 Psychological Distress Scale (11)                                                         | 10 five-point Likert dimensions (Min = 0; Max = 40). Higher = negative. Cronbach's alpha = .93                                                                                                                                                                                                                                                                     |
| 15 | Barratt Impulsivity Scale (12)                                                                 | 30 four-point scale dimensions organized in three categories: motor impulsivity, cognitive impulsivity, impulsivity due to lack of planning (Min = 30; Max = 120). Higher = negative                                                                                                                                                                               |
| 16 | Montreal Cognitive Assessment (MOCA) (13)                                                      | Screening for mild cognitive dysfunction (Min = 0; Max = 30). Higher = negative                                                                                                                                                                                                                                                                                    |
| 17 | Mental Health Services Questionnaire, based on CCHS 1.2.                                       | Yes/No and multiple-choice questions; Likert and non-Likert scale questions                                                                                                                                                                                                                                                                                        |
| 18 | Questionnaire on life events (14)                                                              | 25 4-point scale dimensions organized in 5 major themes: events subsequently assembled to income, love, links with family and friends, housing, experiences aggression.                                                                                                                                                                                            |

*All measurement instruments were validated among the French population.*

1. Statistics Canada. Canadian Community Health Survey (CCHS). 2002
2. Baker F, Intaglia J: Quality of life in the evaluation of Community support systems. *Evaluation and Program Planning* 5:69-79, 1982
3. Perkins DD, Long DA: Neighborhood sense of community and social capital: A multi-level analysis. . In A T Fisher, C C Sonn & B J Bishop (Eds), *Psychological sense of community: Research, applications and implications* 291-318, 2002
4. Saegert S, Winke G: Crime, social capital, and community participation. *American Journal of Community Psychology* 34:219-33, 2004
5. Nario-Redmond M, Coulton C. Measuring resident perceptions of neighborhood conditions: survey methodology. 2000.
6. Sampson RJ, Morenoff JD, Gannon-Rowley T: Assessing "neighbourhood effects": Social processes and new directions in research. *Annual Review of Sociology* 28:443-78, 2002
7. Long DA, Perkins DD: Confirmatory factor analyses of the sense of Community Index and development of a Brief SCI. *Journal of Community Psychology* 31:279-96, 2003
8. Alexander A, Bergman P, Hagströmer M, et al.: IPAQ environmental module; reliability testing. *Journal of Public Health* 14:76-80, 2006
9. Cutrona CE, Russell DW: The provision of social support and adaptation to stress. *Advances in Personal relationships* 1:37-67, 1987
10. Kay SR, Wolkenfeld F, Murrill LM: Profiles of aggression among psychiatric patients. I. Nature and prevalence. *Journal of Nervous & Mental Disease* 176:539-46, 1988
11. Kessler RC, Barker PR, Colpe LJ, et al.: Screening for serious mental illness in the general population. *Archives of General Psychiatry* 60:184-9, 2003
12. Barratt ES. Impulsiveness subtraits: Arousal and information processing. In: Spence JT, Izards CE, editors. *Motivation, emotion and personality*. North Holland: Elsevier Science Publishers; 1985. p. 137-46.
13. Nasreddine ZS, Phillips NA, Bédirian V, et al.: The Montreal Cognitive Assessment, MoCA: a brief screening tool for mild cognitive impairment. *Journal of the American Geriatric Society* 53:695-9, 2005
14. Laurin I. ☒ Risk factors for the homeless condition. Comparison of a new cohort of homeless people and poor domiciled in a cohort. [In French] Doctorat Thesis, University of Montreal
